# Supplementary material for: Promoting vigorous intermittent lifestyle physical activity (vilpa) in middle-aged adults: an evaluation of the movsnax mobile app
Source: PubMed Central journal article supplement (PMC11318164; doi:10.1186/s12889-024-19549-9), 2024-08-12
Supplement: 12889_2024_19549_MOESM5_ESM.pdf [file 12889_2024_19549_MOESM5_ESM.pdf]

Table S5. Part C Socio-demographic and health characteristics of participants (N=35)

|                                              | Values n (%) |
|----------------------------------------------|--------------|
| <b>Sex</b>                                   |              |
| Female                                       | 28 (80)      |
| Male                                         | 7 (20)       |
| <b>Age (years)</b>                           |              |
| 40-45                                        | 5 (14.29)    |
| 46-50                                        | 4 (11.43)    |
| 51-55                                        | 6 (17.14)    |
| 56-60                                        | 9 (25.71)    |
| 60-65                                        | 11 (31.43)   |
| <b>Ethnicity</b>                             |              |
| Oceanian*                                    | 19 (54.3)    |
| Southeast Asian                              | 1 (2.9)      |
| Northeast Asian                              | 1 (2.9)      |
| Southern and Central Asian                   | 1 (2.9)      |
| Northwest European                           | 6 (17.1)     |
| Southern and Eastern European                | 2 (5.7)      |
| Other                                        | 5 (14.3)     |
| <b>Subjective socio-economic status</b>      |              |
| 1 (lowest)                                   | 1 (2.90)     |
| 2                                            | 0 (0)        |
| 3                                            | 2 (5.90)     |
| 4                                            | 1 (2.90)     |
| 5                                            | 3 (8.60)     |
| 6                                            | 7 (20)       |
| 7                                            | 9 (25.70)    |
| 8                                            | 4 (11.4)     |
| 9                                            | 1 (2.90)     |
| 10 (highest)                                 | 2 (5.70)     |
| <b>Highest level of education</b>            |              |
| Year 11 or below (incl. certificate I/II)    | 2 (5.70)     |
| Diploma/Advanced Diploma/Vocational training | 7 (20)       |
| Bachelor/Masters/Graduate Diploma            | 22 (62.90)   |
| Doctoral degree/PhD                          | 2 (5.70)     |
| Other                                        | 2 (5.70)     |
| <b>Marital status</b>                        |              |
| Never married                                | 3 (8.60)     |
| Married/de facto                             | 27 (77.10)   |
| Separated/divorced                           | 5 (14.30)    |
| <b>Work status</b>                           |              |
| Full-time                                    | 12 (34.30)   |
| Part-time                                    | 9 (25.70)    |
| Retired                                      | 8 (22.90)    |
| Other                                        | 6 (17.10)    |
| <b>Current health status</b>                 |              |
| Poor                                         | 1 (2.90)     |

|                          |            |
|--------------------------|------------|
| Fair                     | 4 (11.40)  |
| Good                     | 11 (31.40) |
| Very good                | 17 (48.60) |
| Excellent                | 2 (5.70)   |
| <b>Health issues</b>     |            |
| Yes                      | 18 (51.40) |
| No                       | 17 (48.60) |
| <b>Body Mass Index</b>   |            |
| <25                      | 14 (41.18) |
| >25-<30                  | 10 (29.41) |
| >30                      | 10 (29.41) |
| <b>Weight perception</b> |            |
| Very underweight         | 0 (0)      |
| Slightly underweight     | 1 (2.90)   |
| About the right weight   | 10 (28.60) |
| Slightly overweight      | 11 (31.40) |
| Very overweight          | 13 (37.10) |

---

\*n=18 identified as Australian; n=1 as Aboriginal/Australian South Sea Islander
