# Supplementary material for: Promoting vigorous intermittent lifestyle physical activity (vilpa) in middle-aged adults: an evaluation of the movsnax mobile app
Source: PubMed Central journal article supplement (PMC11318164; doi:10.1186/s12889-024-19549-9), 2024-08-12
Supplement: 12889_2024_19549_MOESM6_ESM.pdf [file 12889_2024_19549_MOESM6_ESM.pdf]

Table S6. Part D Socio-demographic and health characteristics of participants (N=15)

|                                                              | Values n (%) |
|--------------------------------------------------------------|--------------|
| <b>Sex</b>                                                   |              |
| Female                                                       | 11 (73.3)    |
| Male                                                         | 4 (26.7)     |
| <b>Age (years)</b>                                           |              |
| 40-45                                                        | 1 (6.7)      |
| 46-50                                                        | 4 (26.7)     |
| 51-55                                                        | 3 (20)       |
| 56-60                                                        | 5 (33.3)     |
| 61-65                                                        | 2 (13.3)     |
| <b>Ethnicity</b>                                             |              |
| Oceanian*                                                    | 8 (53.3)     |
| Southeast Asian (Southeast, Northeast, Southern and Central) | 0 (0)        |
| Northwest European                                           | 3 (20)       |
| Southern and Eastern European                                | 1 (6.7)      |
| Other                                                        | 3 (20)       |
| <b>Subjective socio-economic status+</b>                     |              |
| 1 (lowest)                                                   | 0 (0)        |
| 2                                                            | 0 (0)        |
| 3                                                            | 1 (0)        |
| 4                                                            | 1 (6.7)      |
| 5                                                            | 2 (13.3)     |
| 6                                                            | 5 (33.3)     |
| 7                                                            | 3 (20)       |
| 8                                                            | 0 (0)        |
| 9                                                            | 1 (6.7)      |
| 10 (highest)                                                 | 0 (0)        |
| <b>Highest level of education</b>                            |              |
| Year 11 or below (incl. certificate I/II)                    | 0 (0)        |
| Diploma/Advanced Diploma/Vocational training                 | 4 (26.7)     |
| Bachelor/Masters/Graduate Diploma                            | 10 (66.7)    |
| Doctoral degree/PhD                                          | 1 (6.7)      |
| Other                                                        | 0 (0)        |
| <b>Marital status</b>                                        |              |
| Never married                                                | 0 (0)        |
| Married/de facto                                             | 13 (86.7)    |
| Separated/divorced                                           | 2 (13.3)     |
| <b>Work status</b>                                           |              |
| Full-time                                                    | 4 (26.7)     |
| Part-time                                                    | 2 (13.3)     |
| Retired                                                      | 4 (26.7)     |
| Other                                                        | 5 (33.3)     |
| <b>Current health status</b>                                 |              |
| Poor                                                         | 0 (0)        |
| Fair                                                         | 2 (13.3)     |
| Good                                                         | 5 (33.3)     |

|                          |          |
|--------------------------|----------|
| Very good                | 8 (53.3) |
| Excellent                | 0 (0)    |
| <b>Health issues</b>     |          |
| Yes                      | 8 (53.3) |
| No                       | 7 (46.7) |
| <b>Body Mass Index</b>   |          |
| <25                      | 7 (46.7) |
| >25-<30                  | 6 (40)   |
| >30                      | 2 (13.3) |
| <b>Weight perception</b> |          |
| Very underweight         | 0 (0)    |
| Slightly underweight     | 0 (0)    |
| About the right weight   | 6 (40)   |
| Slightly overweight      | 7 (46.7) |
| Very overweight          | 2 (13.3) |

---

\*All identified as Australian Caucasian; +n=2 participants did not respond to this question
